# Supplementary material for: HPLC Fingerprint Analysis with the Antioxidant and Cytotoxic Activities of Selected Lichens Combined with the Chemometric Calculations
Source: PubMed Central journal article supplement (PMC7571045; doi:10.3390/molecules25184301), 2020-09-19
Supplement: molecules-25-04301-s001.pdf [file molecules-25-04301-s001.pdf]

## Supplementary Material

# HPLC Fingerprint Analysis with the Antioxidant and Cytotoxic Activities of Selected Lichens Combined with the Chemometric Calculations

Anna Hawrył<sup>1</sup>, Mirosław Hawrył<sup>1,\*</sup>, Agnieszka Hajnos-Stolarz<sup>2</sup>, Jagoda Abramek<sup>3</sup>, Anna Bogucka-Kocka<sup>3</sup> and Łukasz Komsta<sup>4</sup>

<sup>1</sup> Department of Inorganic Chemistry, Faculty of Pharmacy, Medical University of Lublin, Chodźki 4a St. 20-093 Lublin, Poland; [anna.hawryl@umlub.pl](mailto:anna.hawryl@umlub.pl) (A.H.)

<sup>2</sup> Herbapol-Lublin S.A., Diamentowa 25 Street, 20-471 Lublin, Poland; [ahajnos@gmail.com](mailto:ahajnos@gmail.com) (A.H.-S.)

<sup>3</sup> Department of Biology and Genetics, Medical University, Chodźki 4A Street, 20-093 Lublin, Poland; [anna.bogucka-kocka@umlub.pl](mailto:anna.bogucka-kocka@umlub.pl) (A. B.-K.), [jagoda.abramek@umlub.pl](mailto:jagoda.abramek@umlub.pl) (J.A.)

<sup>4</sup> Chair and Department of Drug Chemistry, Medical University, Jaczewskiego 4 Street, 20-090 Lublin, Poland; [lukasz.komsta@umlub.pl](mailto:lukasz.komsta@umlub.pl) (L.K.)

\* Correspondence: [mirek.hawryl@umlub.pl](mailto:mirek.hawryl@umlub.pl) (M.H.)

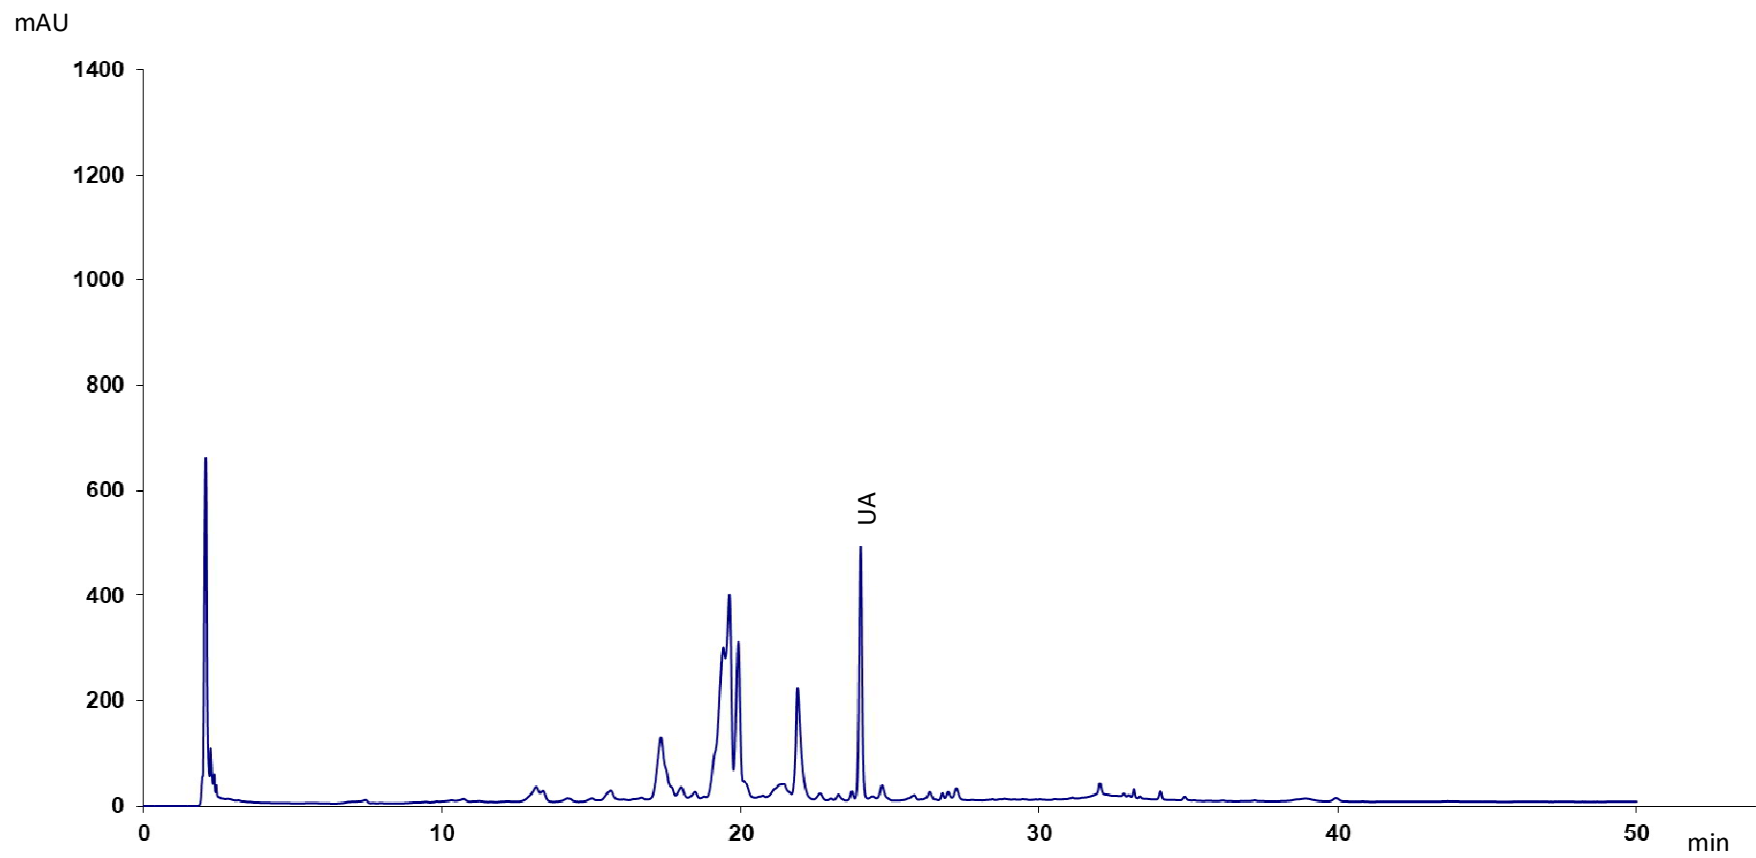

Figure S1. The chromatogram of *Cladina mitis* (CM) methanolic extract, UA – usnic acid.

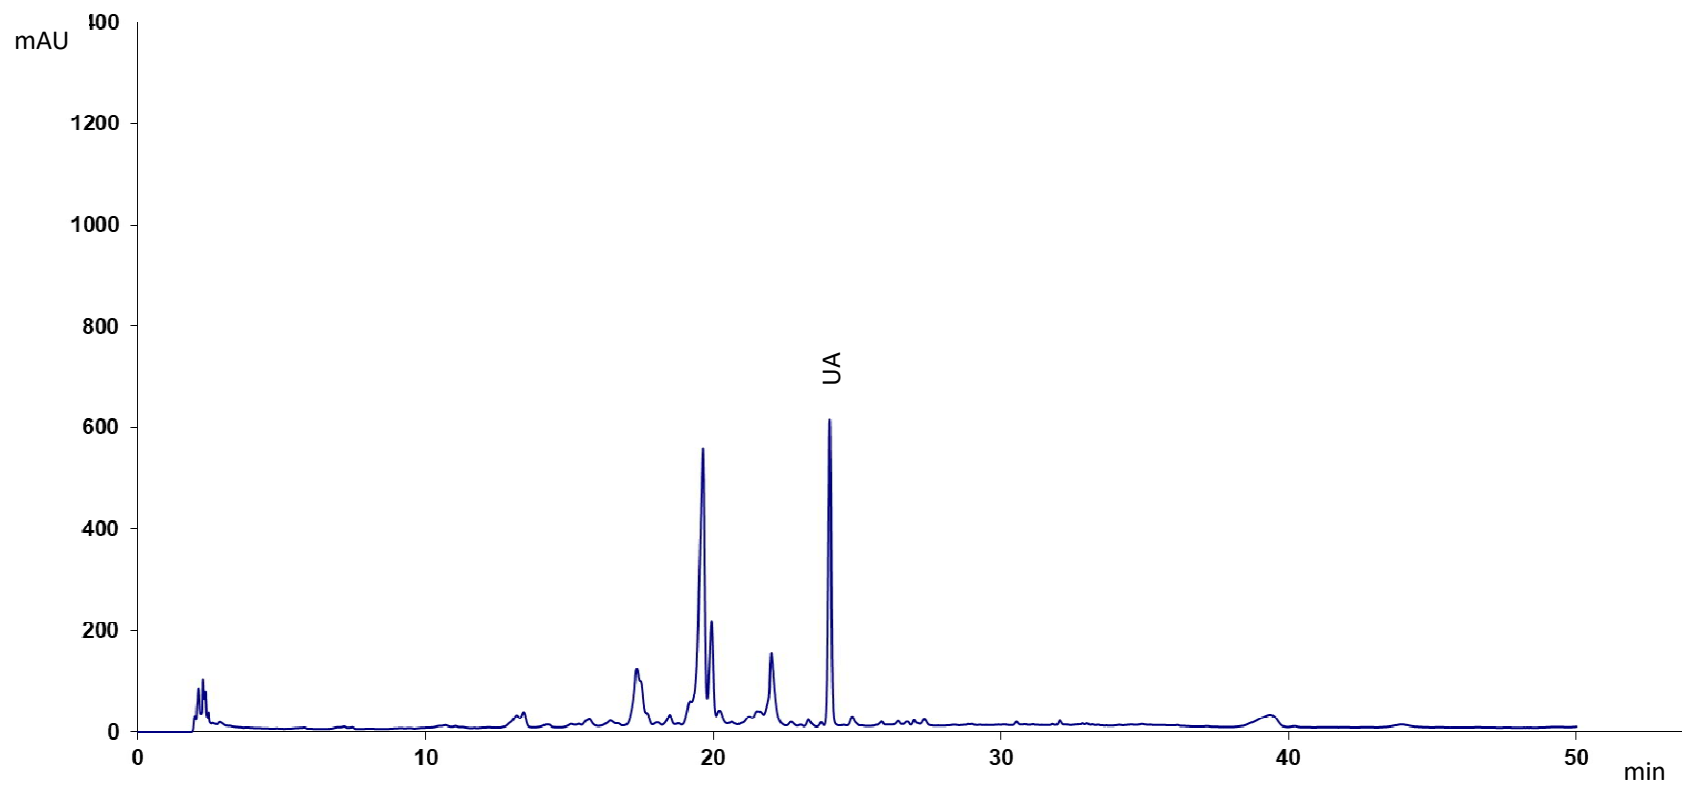

Figure S2. The chromatogram of *Cladina mitis* (CM1) methanolic extract, UA – usnic acid.

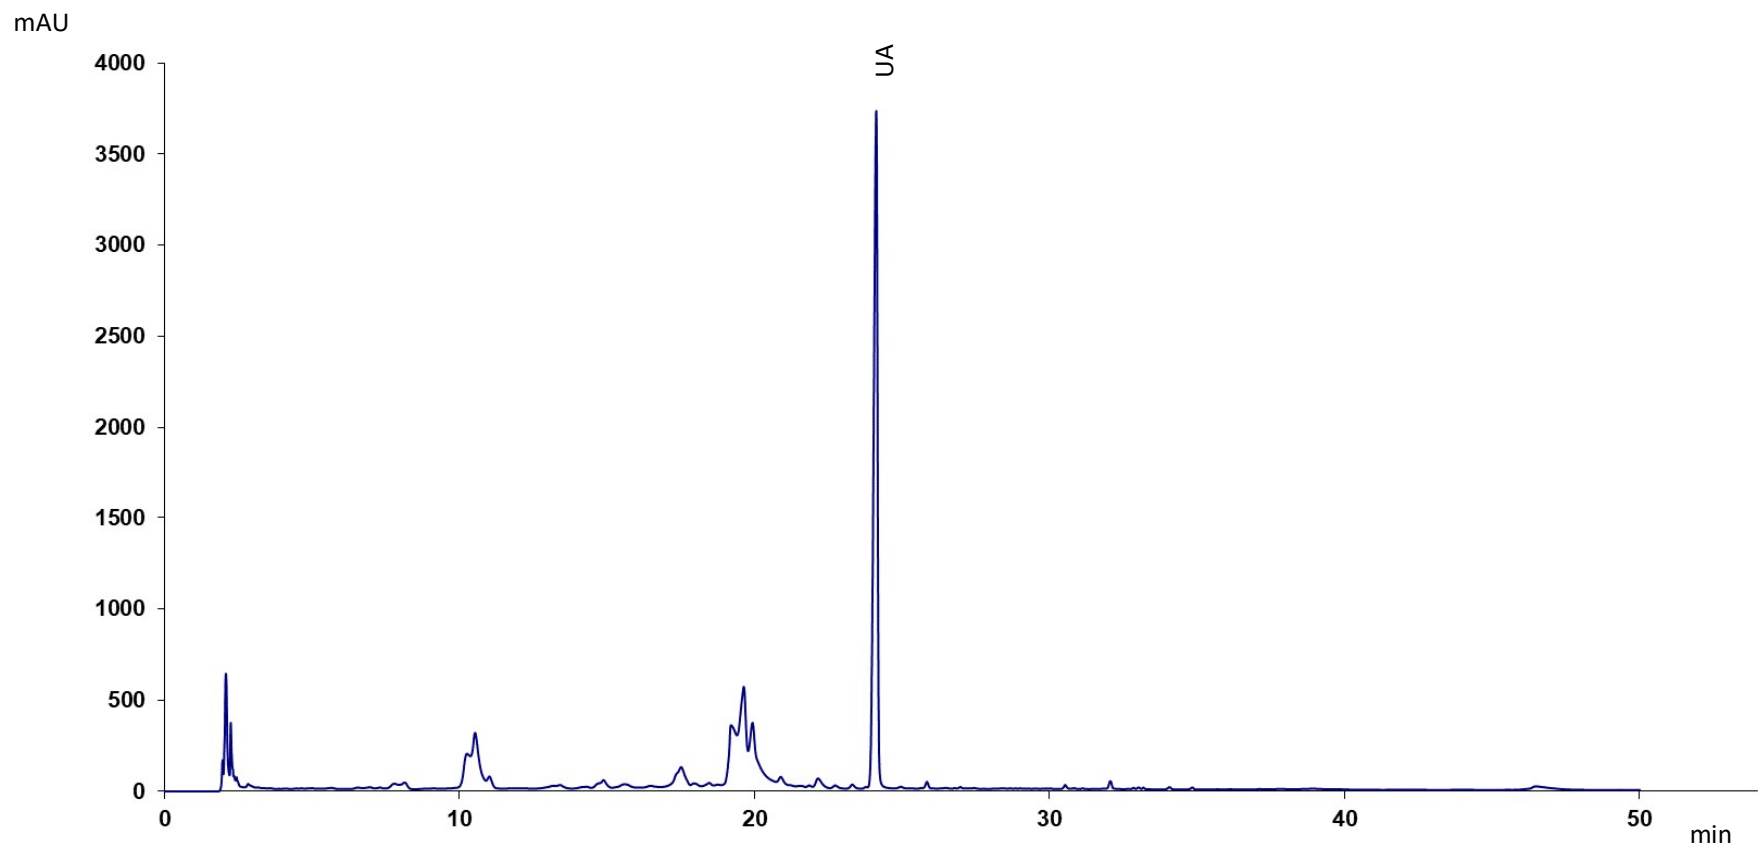

Figure S3. The chromatogram of *Cladina arbuscula* (CSYL) methanolic extract, UA – usnic acid.

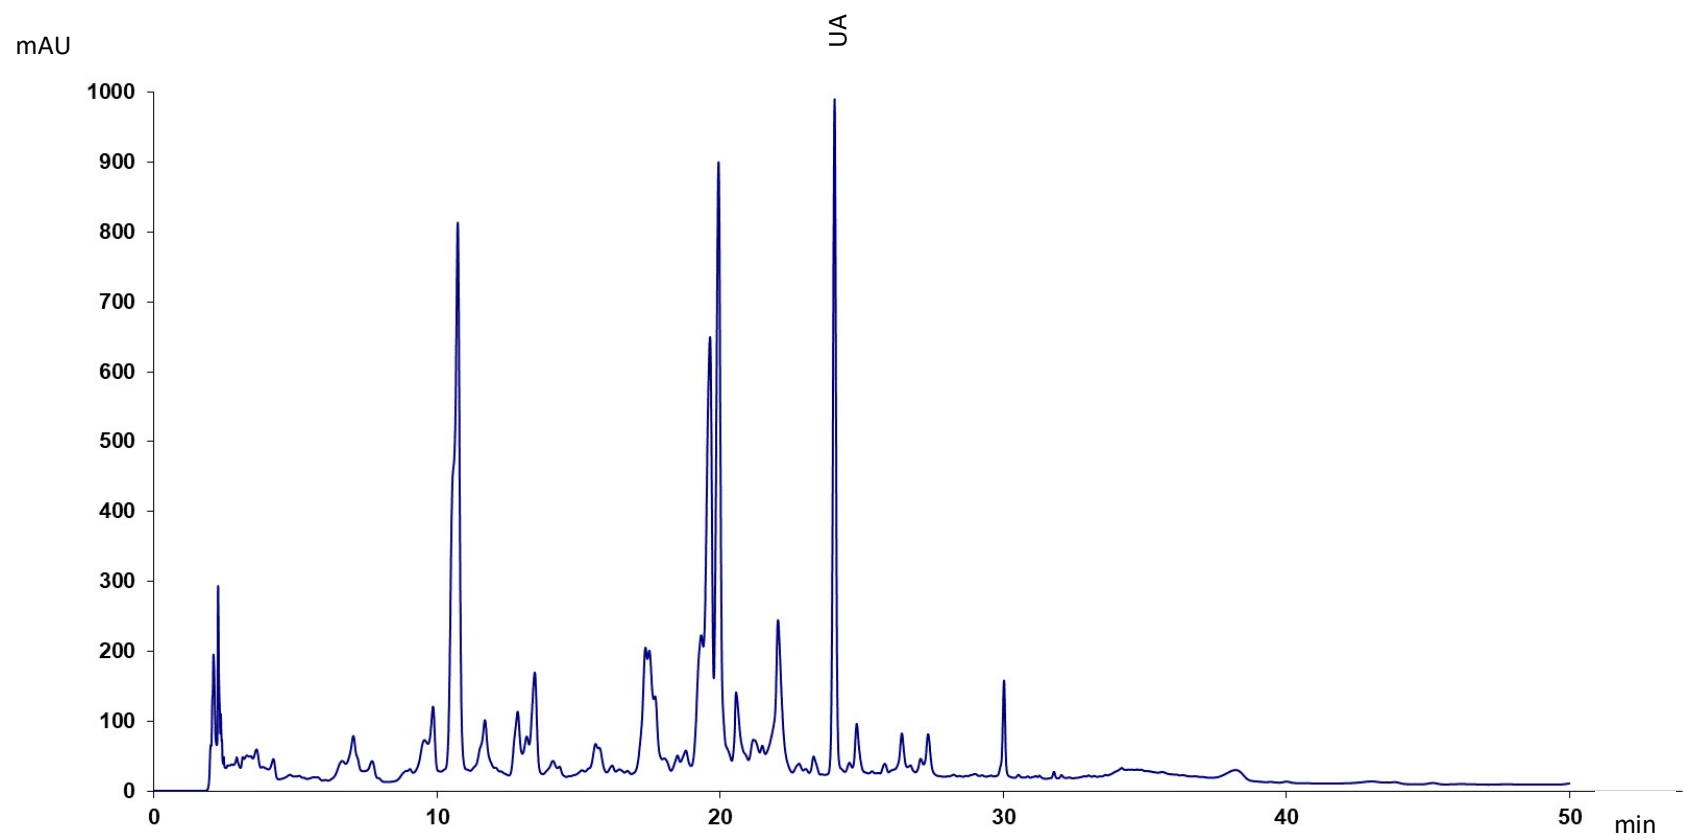

Figure S4. The chromatogram of *Evernia prunastri* (EP) methanolic extract, UA – usnic acid.

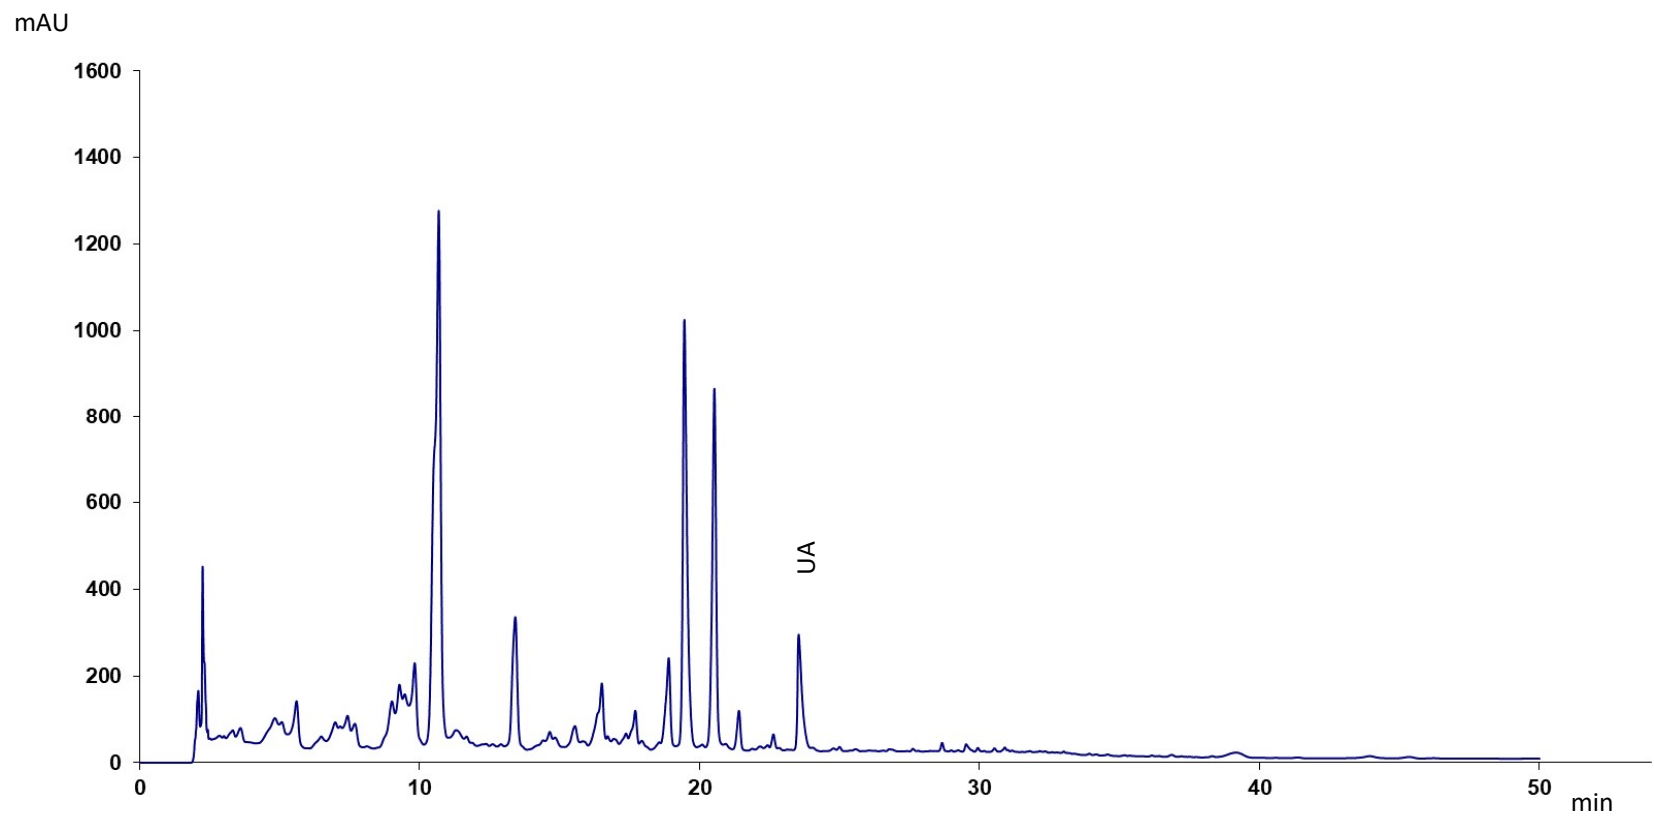

Figure S5. The chromatogram of *Hypogymnia physodes* (HP) methanolic extract, UA – usnic acid.

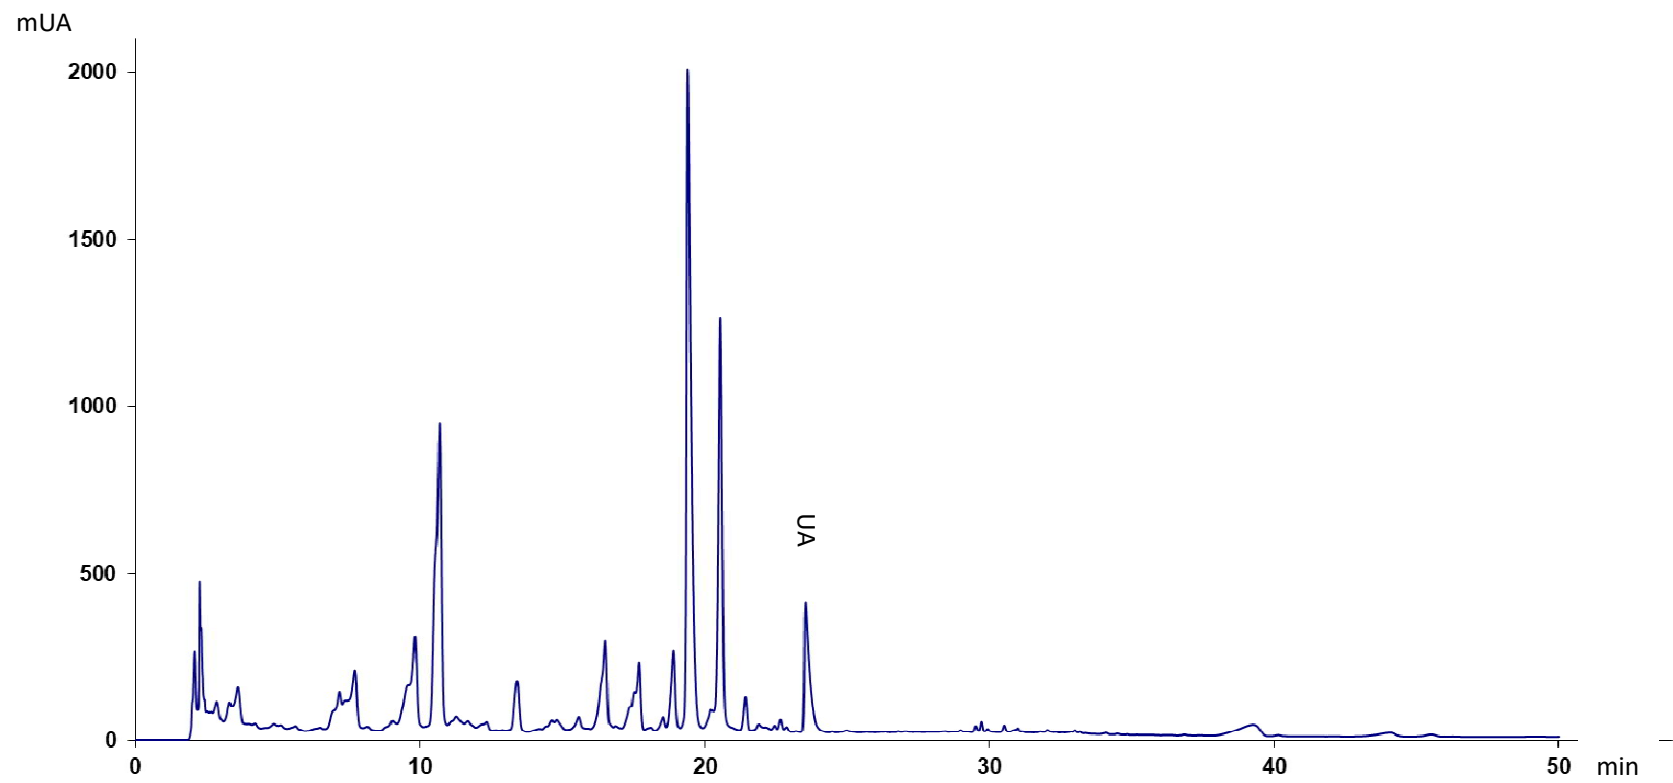

Figure S6. The chromatogram of *Hypogymnia physodes* (HP1) methanolic extract, UA – usnic acid.

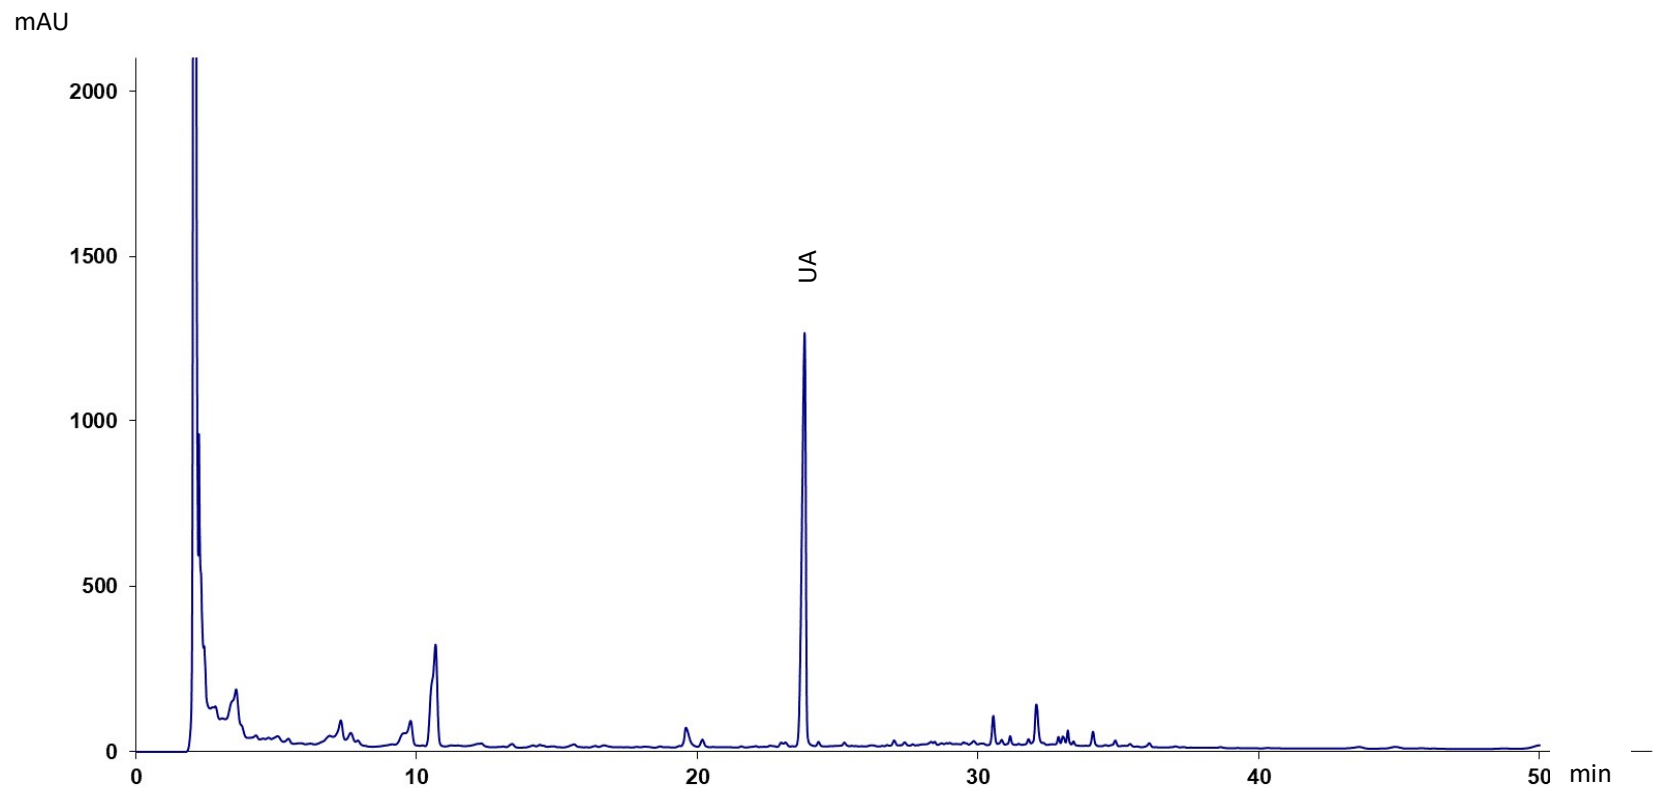

Figure S7. The chromatogram of *Xanthoria parietina* (XP) methanolic extract, UA – usnic acid.
